# Supplementary material for: How alkali cations affect salt precipitation and CO2electrolysis performance in membrane electrode assembly electrolyzers
Source: Royal Society of Chemistry journal article supplement (doi:10.1039/d2ee03725d), 2023-01-01
Supplement: d2ee03725d1.pdf [file d2ee03725d1.pdf]

**--Supplementary Information--**

**How alkali cations affect salt precipitation and CO<sub>2</sub> electrolysis performance in membrane electrode assembly CO<sub>2</sub> electrolyzers**

Sahil Garg<sup>a, †</sup>, Qiucheng Xu<sup>a, †</sup>, Asger B. Moss<sup>a</sup>, Marta Mirolo<sup>b</sup>, Wanyu Deng<sup>a</sup>, Ib Chorkendorff<sup>a</sup>, Jakub Drnec<sup>b</sup>, Brian Seger<sup>a, \*</sup>

<sup>a</sup>*Surface Physics and Catalysis (Surf Cat) Section, Department of Physics, Technical University of Denmark, 2800 Kgs. Lyngby, Denmark*

<sup>b</sup>*Experimental Division, European Synchrotron Radiation Facility, Grenoble, France*

<sup>†</sup>*Joint first authors: Sahil Garg; Qiucheng Xu*

<sup>\*</sup>*Corresponding author: Brian Seger, Email: brse@fysik.dtu.dk*

## Supplementary Note 1: Detailed analysis of cation effect on CO<sub>2</sub>E over Cu GDEs used in MEA electrolyzer

In literature, the effect of alkali cations on CO<sub>2</sub>E is extensively studied,<sup>1-3</sup> however, there are no exclusive studies<sup>4</sup> reported on cation's effect in a MEA electrolyzer (especially over Cu GDEs). The CO<sub>2</sub>RR selectivity trends shown in Figure 2a match very well with the CO<sub>2</sub>E studies conducted in H-cell<sup>5, 6</sup> and catholyte-based electrolyzers.<sup>7, 8</sup> The local environment at the cathode in MEA is completely different than in aqueous electrolyte systems where water is in abundant amount (55 M) and the cathode becomes CO<sub>2</sub> mass transport limited at current densities > 10 mA·cm<sup>-2</sup> for H-cell,<sup>9, 10</sup> and current densities > 100 mA·cm<sup>-2</sup> for catholyte-based electrolyzer.<sup>11</sup> However, in MEA electrolyzers, water concentration decreases, and CO<sub>2</sub> supply remains higher (close to its saturation limit) even at current densities ~ 1000 mA·cm<sup>-2</sup>.<sup>12</sup> Our additional experiments performed at lower current densities (25 mA·cm<sup>-2</sup>) and constant cell potential (2.75 V) show similar HER and CO<sub>2</sub>RR selectivity trends (see Figures S2 and S3) to what we observe in Figure 2a; the only difference is higher production of C<sub>1</sub> products (CO and formate) at low overpotentials while ethylene takes over at higher overpotentials. Between (Na/K/Cs)HCO<sub>3</sub>, the electrolyzer operates at similar cell potential (regardless of current density), however, a slightly higher cell potential (> 50 mV, Figure S1) with NaHCO<sub>3</sub> leads to higher methane (see Figure 2a and S2) which in general has a slightly higher onset potential.

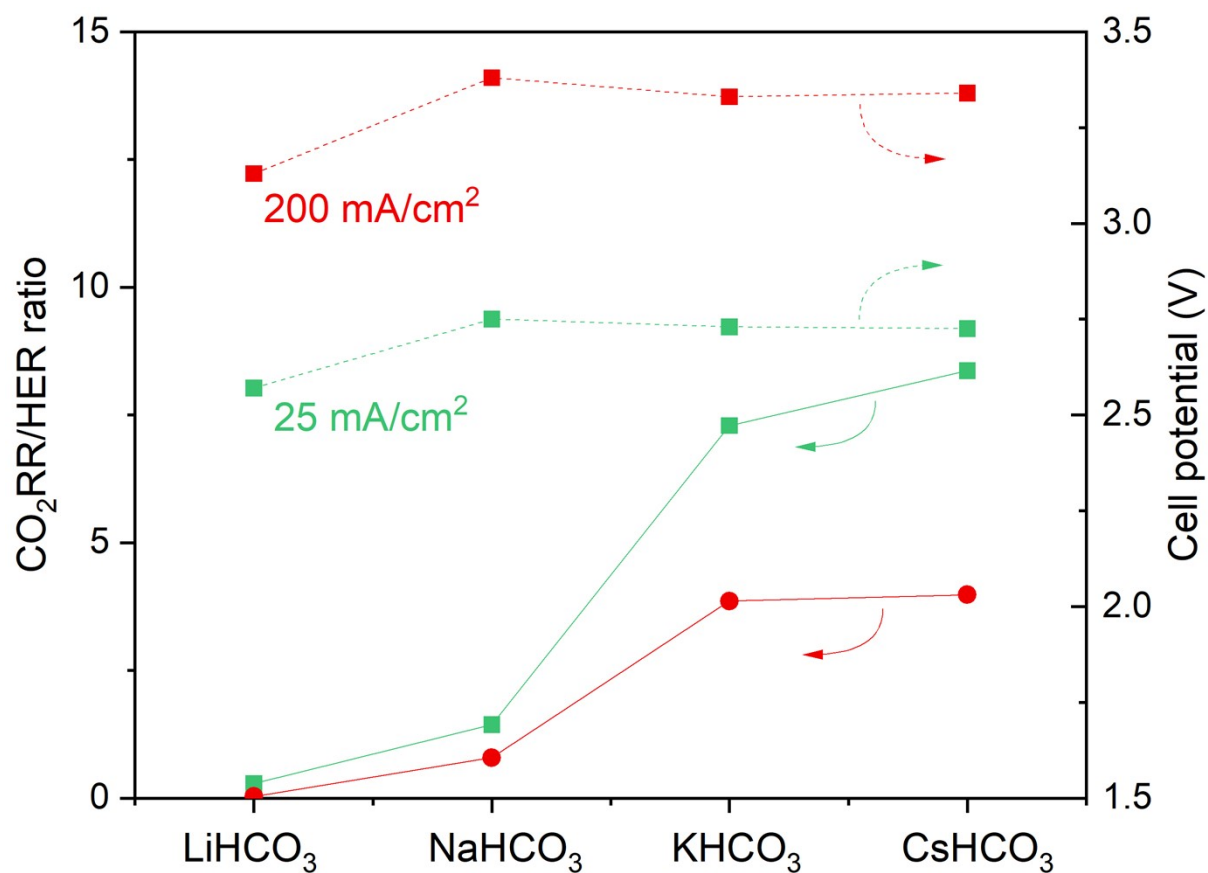

Figure S1. Comparison of CO<sub>2</sub>RR/ HER ratio (left y-axis) and cell potential (right y-axis) over different alkali cations at 25 and 200 mA·cm<sup>-2</sup>. All tests were performed for around 1 h using a fresh set of cathodes, anode, and AEM. The data shown are without X-rays (performed at DTU lab).

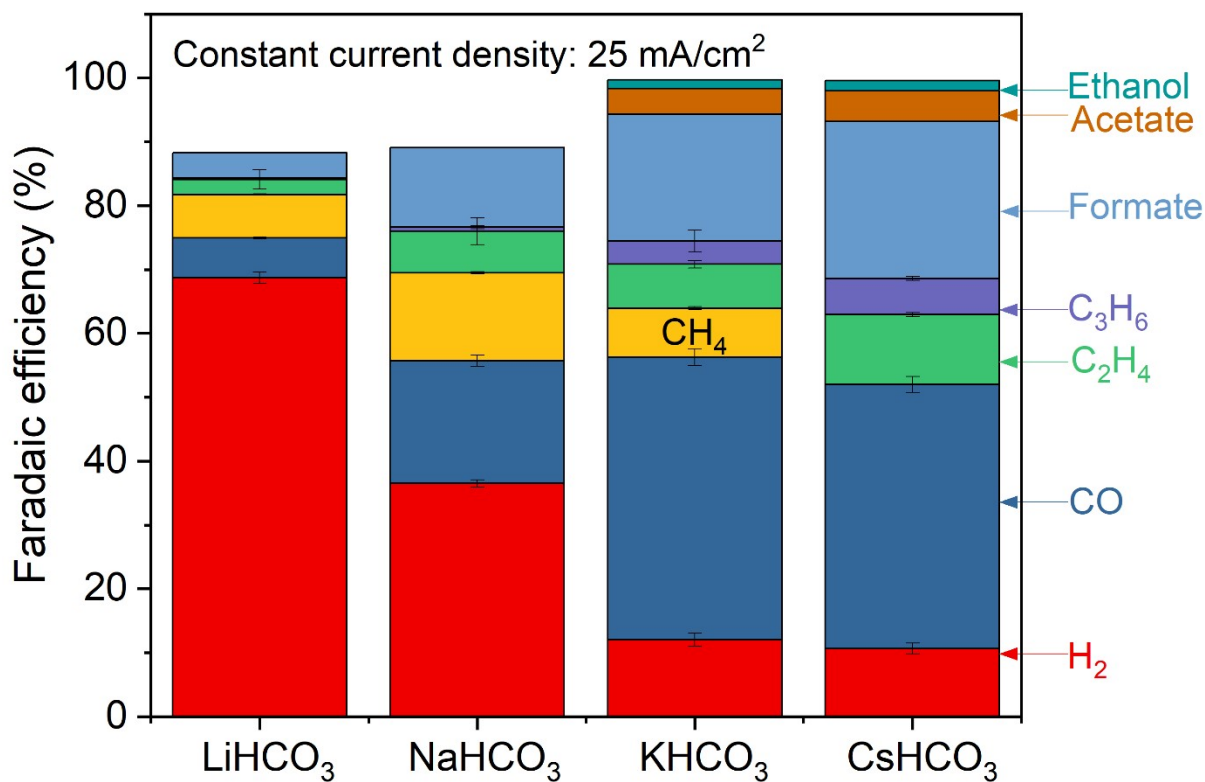

Figure S2. Changes in CO<sub>2</sub>RR and HER selectivity with 0.1 M MHCO<sub>3</sub> analyte (where M could be Li, Na, K, and Cs) at 25 mA·cm<sup>-2</sup>. All tests were performed for around 1 h using a fresh set of cathode, anode, and AEM. The data shown are without X-rays (performed at DTU lab).

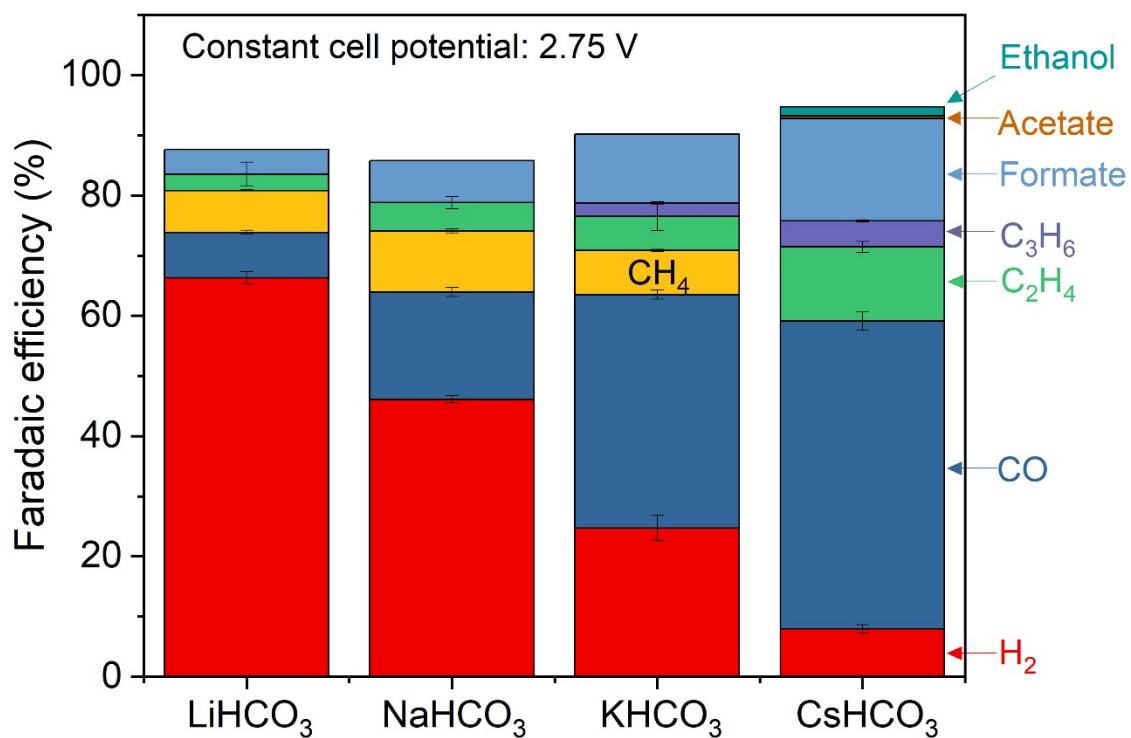

Figure S3. Changes in CO<sub>2</sub>RR and HER selectivity with 0.1 M MHCO<sub>3</sub> anolyte (where M could be Li, Na, K, and Cs) at 2.75 V (without any *iR* correction). All tests were performed for around 1 h using a fresh set of cathode, anode, and AEM. The data shown are without X-rays (performed at DTU lab).

## Supplementary Note 2: CO<sub>2</sub>/O<sub>2</sub> ratio at the anode

To understand CO<sub>2</sub> evolving at the anode along with oxygen evolution reaction, we look at different reactions happening both at the cathode and anode during CO<sub>2</sub> electrolysis. The reduction reactions at the cathode result in the production of OH<sup>-</sup> ions (as shown in reactions S1 and S2). These OH<sup>-</sup> ions then react with the feed CO<sub>2</sub> to form HCO<sub>3</sub><sup>-</sup> or CO<sub>3</sub><sup>2-</sup> (as depicted in reactions S3 and S4).

### Reduction reactions at the cathode

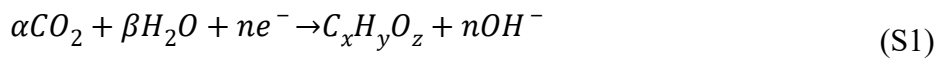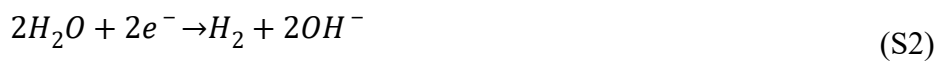

### Homogenous buffer reactions at the cathode

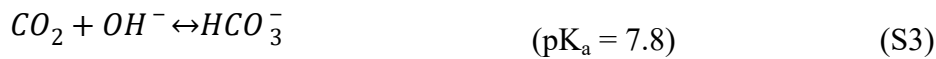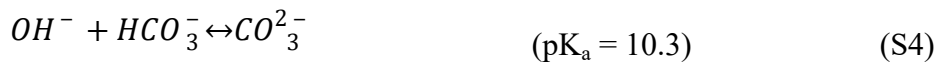

The anions including OH<sup>-</sup>, HCO<sub>3</sub><sup>-</sup> or CO<sub>3</sub><sup>2-</sup> will subsequently diffuse towards the anode via the anion exchange membrane as ion-carriers. The anodically produced protons (as shown in reaction S5) then neutralizes these diffused anions to form water and/or evolve CO<sub>2</sub> at the anode (see reactions S6 to S8).

### Oxidation reaction at the anode

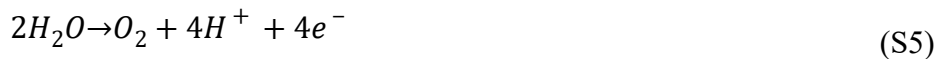

### Homogenous neutralization reactions at the anode

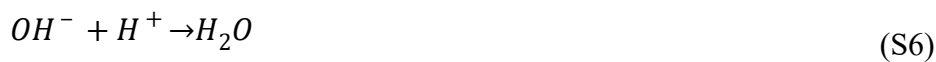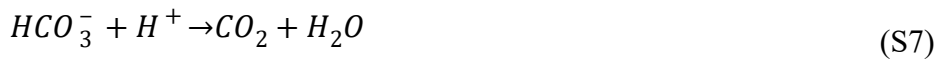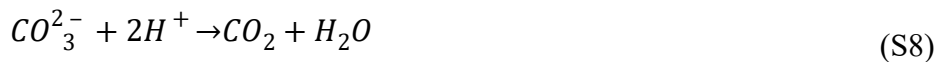

By combining the oxidation reaction S5 with homogenous reactions S6 to S8, we will obtain the equations S9 to S11, which clearly explains that when there is pure OH<sup>-</sup> transfer through the AEM, the CO<sub>2</sub>/O<sub>2</sub> ratio is 0; when it is pure HCO<sub>3</sub><sup>-</sup> transfer, the ratio should be 4 while it should be 2 when CO<sub>3</sub><sup>2-</sup> are the ion carriers through the AEM.

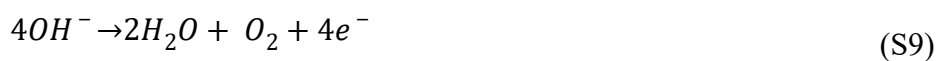

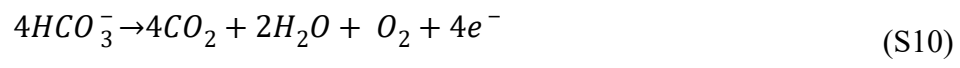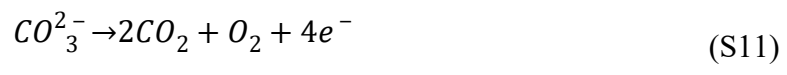

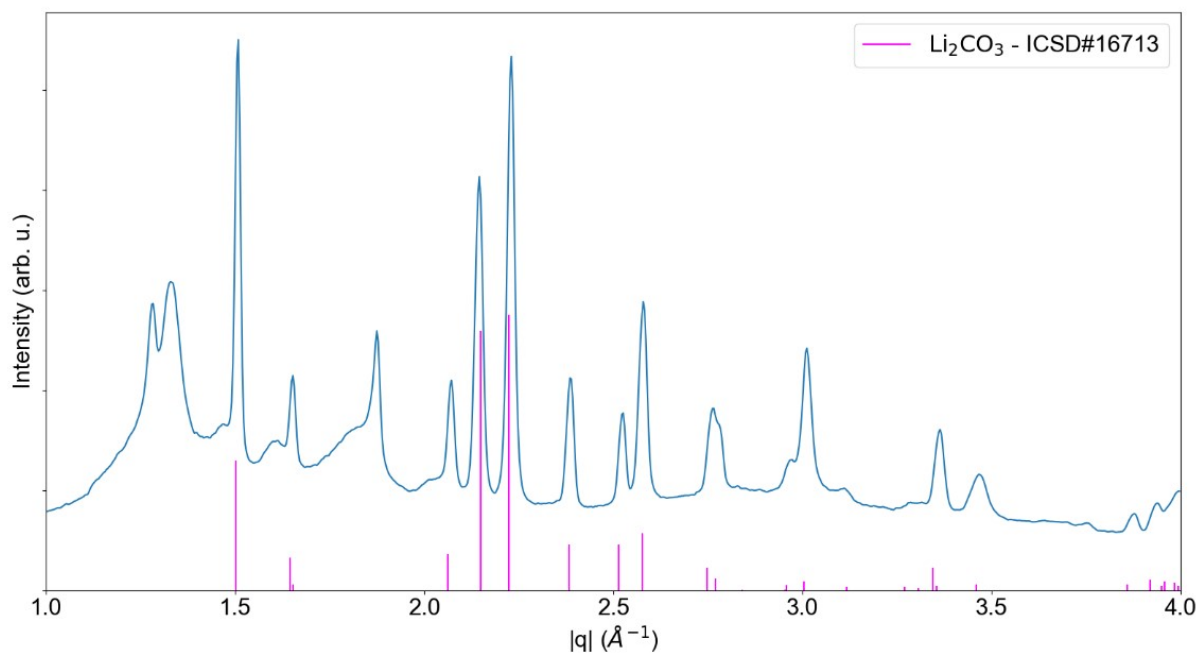

Figure S4. Single pattern with Li<sub>2</sub>CO<sub>3</sub> present as salt on the Cu catalyst layer. Reference patterns for Li<sub>2</sub>CO<sub>3</sub> (magenta) are shown below.



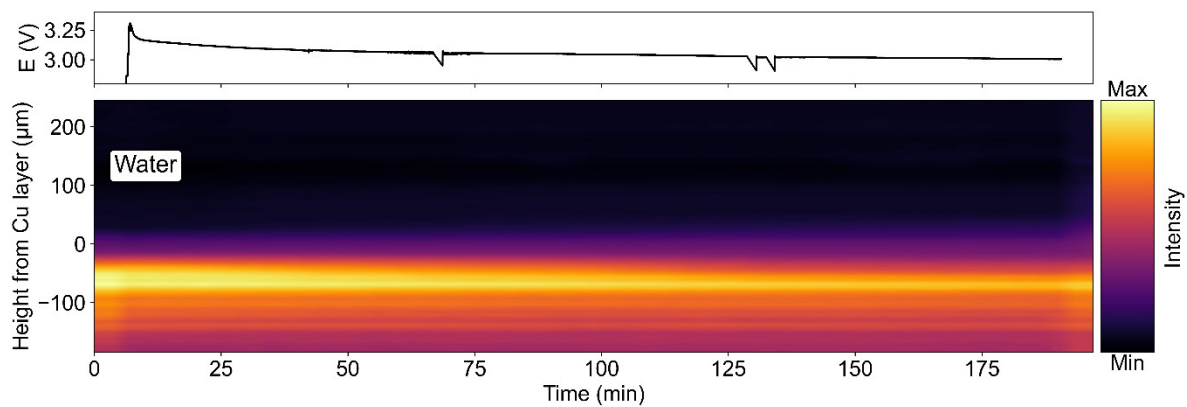

Figure S5. Change in cell potential (top) and background intensity (meaning a change in electrolyte content, bottom plot) in the MEA over electrolysis time. The experiment was performed at  $200 \text{ mA} \cdot \text{cm}^{-2}$  and in  $0.1 \text{ M LiHCO}_3$  anolyte (same as the one shown in Figure 3).

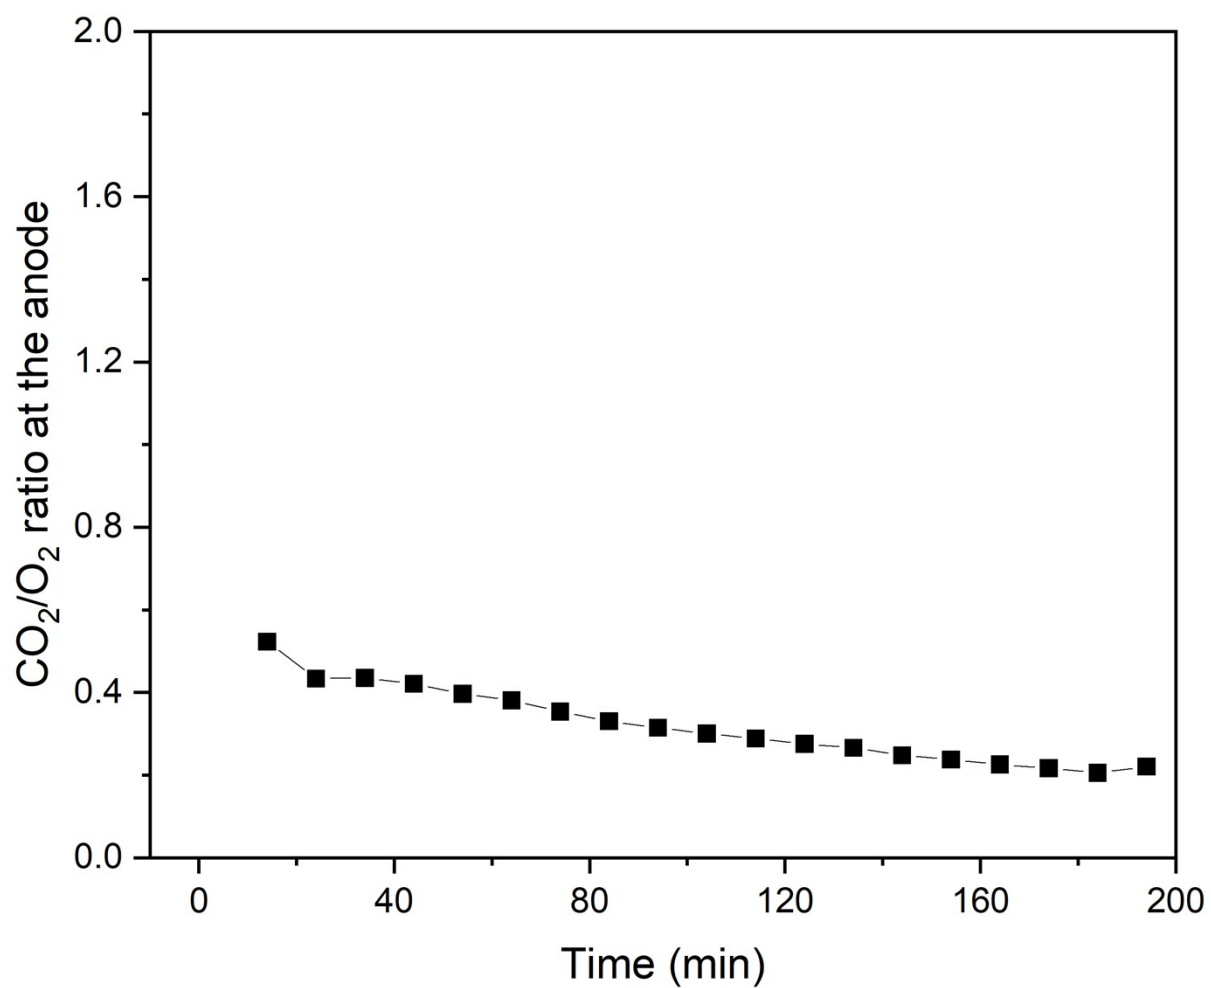

Figure S6. Changes in  $\text{CO}_2/\text{O}_2$  ratio at the anode outlet as a function of electrolysis time. The experiment was performed at  $200 \text{ mA}\cdot\text{cm}^{-2}$  and in  $0.1 \text{ M LiHCO}_3$  anolyte (same as the one shown in Figure 3).

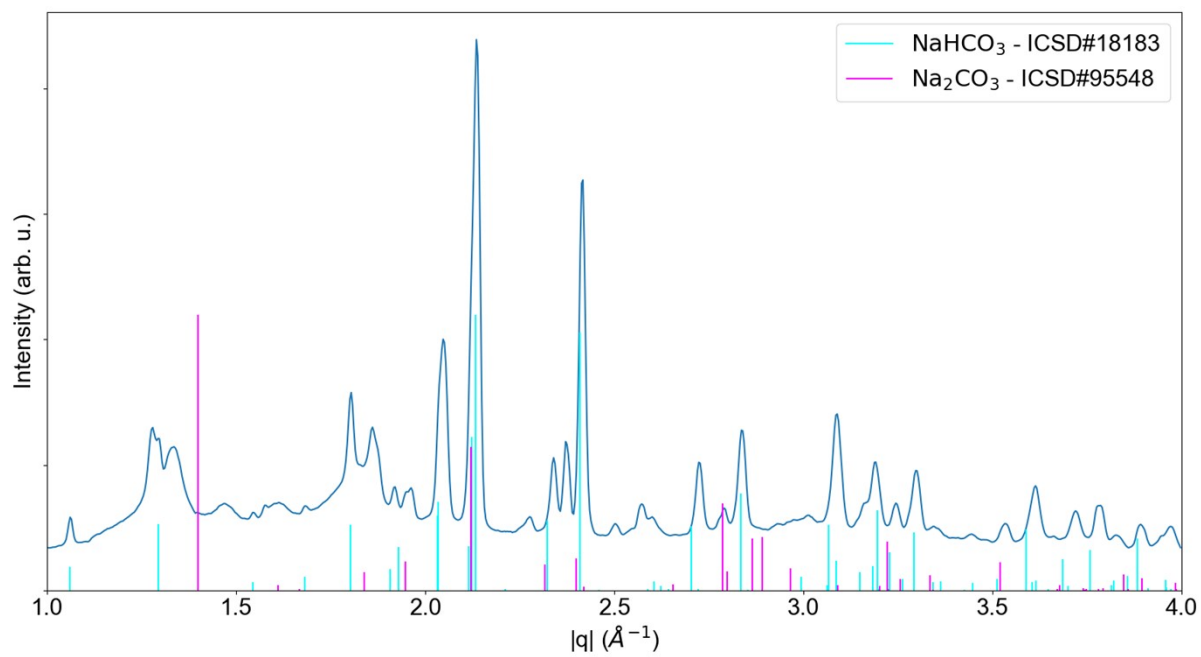

Figure S7. Single pattern with NaHCO<sub>3</sub> present as salt in the GDE. Reference patterns for NaHCO<sub>3</sub> (cyan) and Na<sub>2</sub>CO<sub>3</sub> (magenta) are shown below.

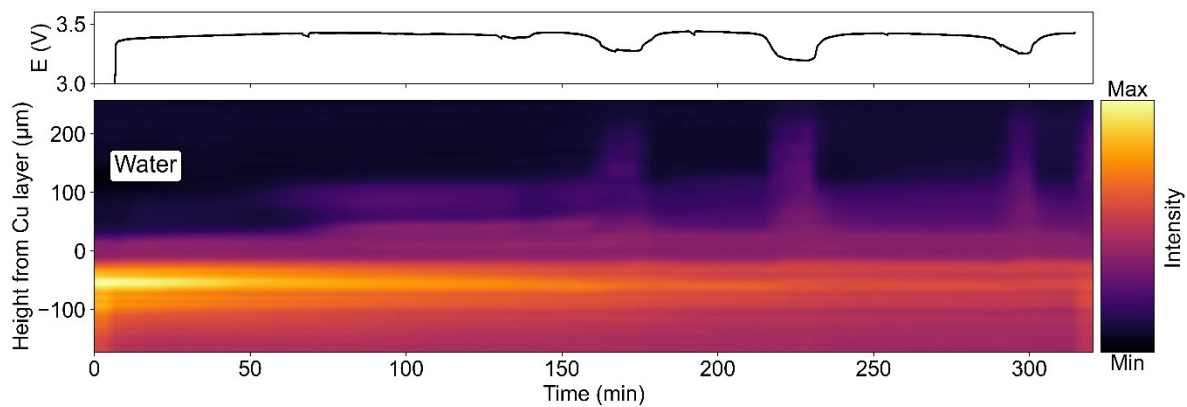

Figure S8. Change in cell potential (top plot) and background intensity (meaning a change in electrolyte content, bottom plot) near the catalyst surface over electrolysis time. The experiment was performed at  $200 \text{ mA}\cdot\text{cm}^{-2}$  and in  $0.1 \text{ M NaHCO}_3$  anolyte (same as the one shown in Figure 4).

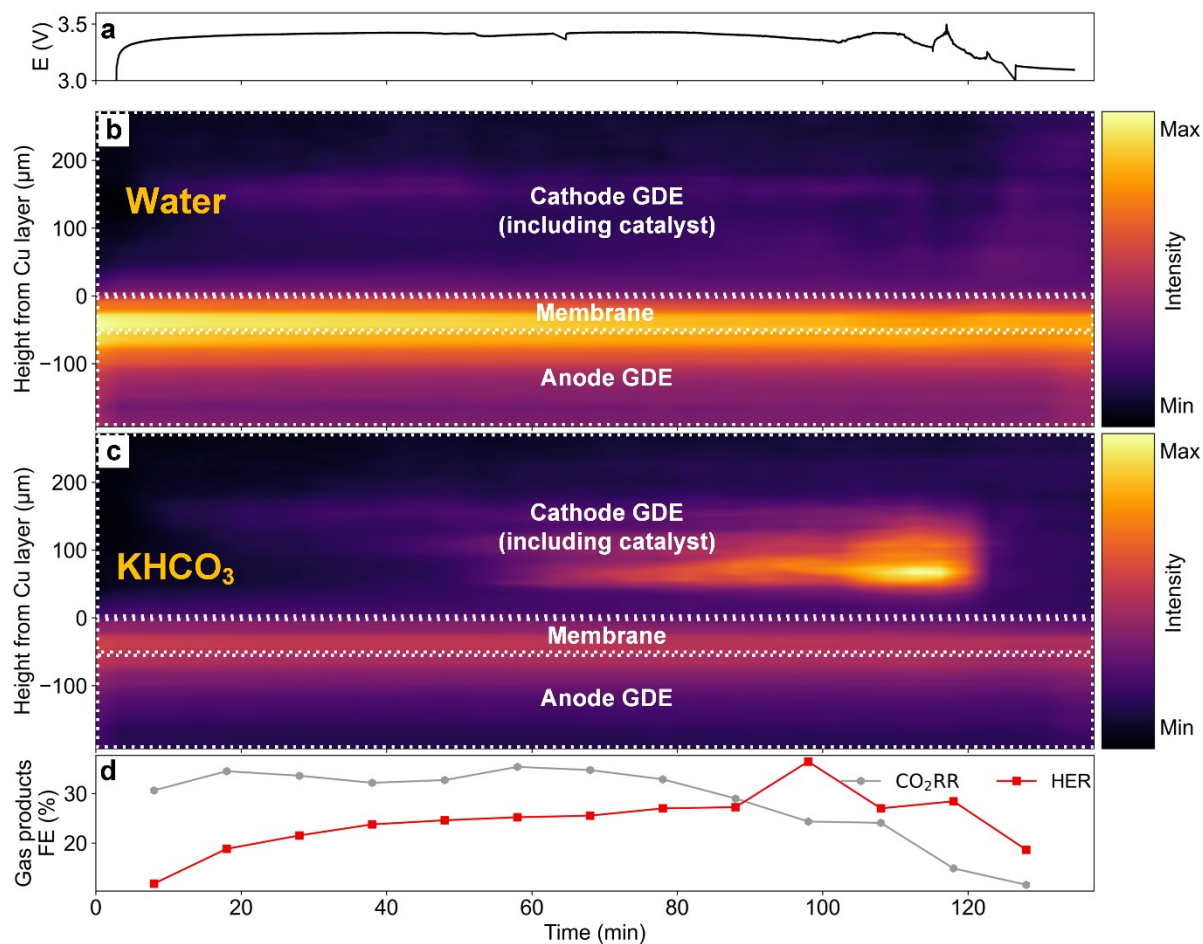

Figure S9. Changes in (a) cell potential, (b) electrolyte/water evolution, (c) salt precipitation, and (d) gaseous  $\text{CO}_2\text{RR}$ /HER selectivity in the MEA over electrolysis time. The experiment was performed at  $200 \text{ mA}\cdot\text{cm}^{-2}$  and in  $0.1 \text{ M KHCO}_3$  anolyte. The color intensities shown in (b) and (c) are not comparable with each other and should be treated separately.

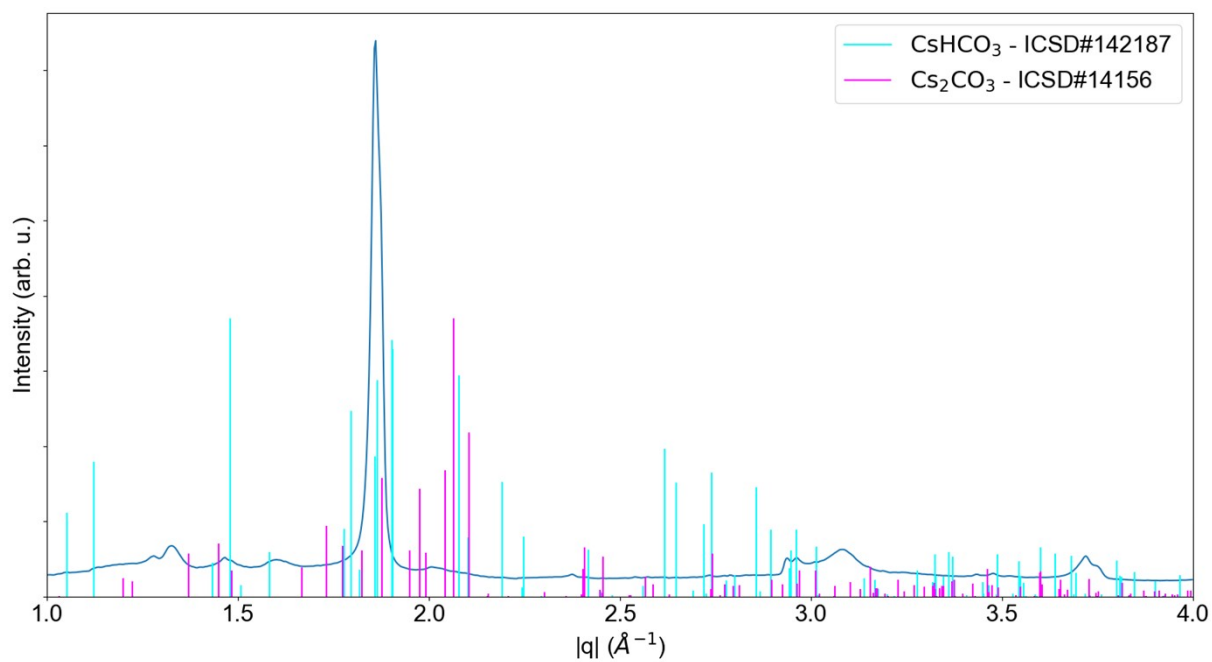

Figure S10. Single pattern showing where salt peaks could be observed if there is any salt precipitation in the GDE with reference patterns for  $\text{CsHCO}_3$  (cyan) and  $\text{Cs}_2\text{CO}_3$  (magenta) are shown below.

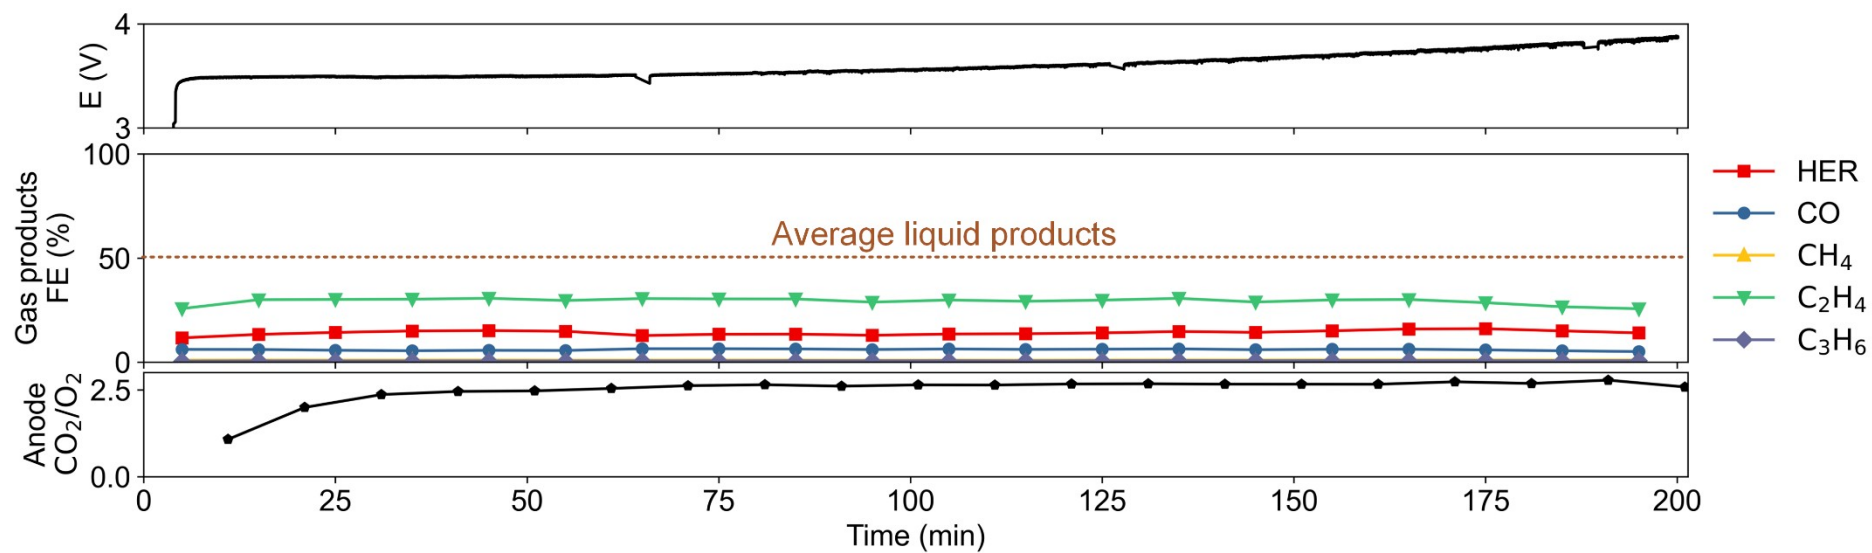

Figure S11. Changes in cell potential (top plot), CO<sub>2</sub>RR/HER selectivity (middle plot), and CO<sub>2</sub>/O<sub>2</sub> ratio at the anode (bottom plot) over electrolysis time. The experiment was performed at 200 mA·cm<sup>-2</sup> and in 0.1 M CsHCO<sub>3</sub> anolyte (the same as shown in Figure 5 of the main manuscript). The brown dotted line in middle plot refers to the average selectivity of liquid products (see Table S4 for detailed liquid product data).

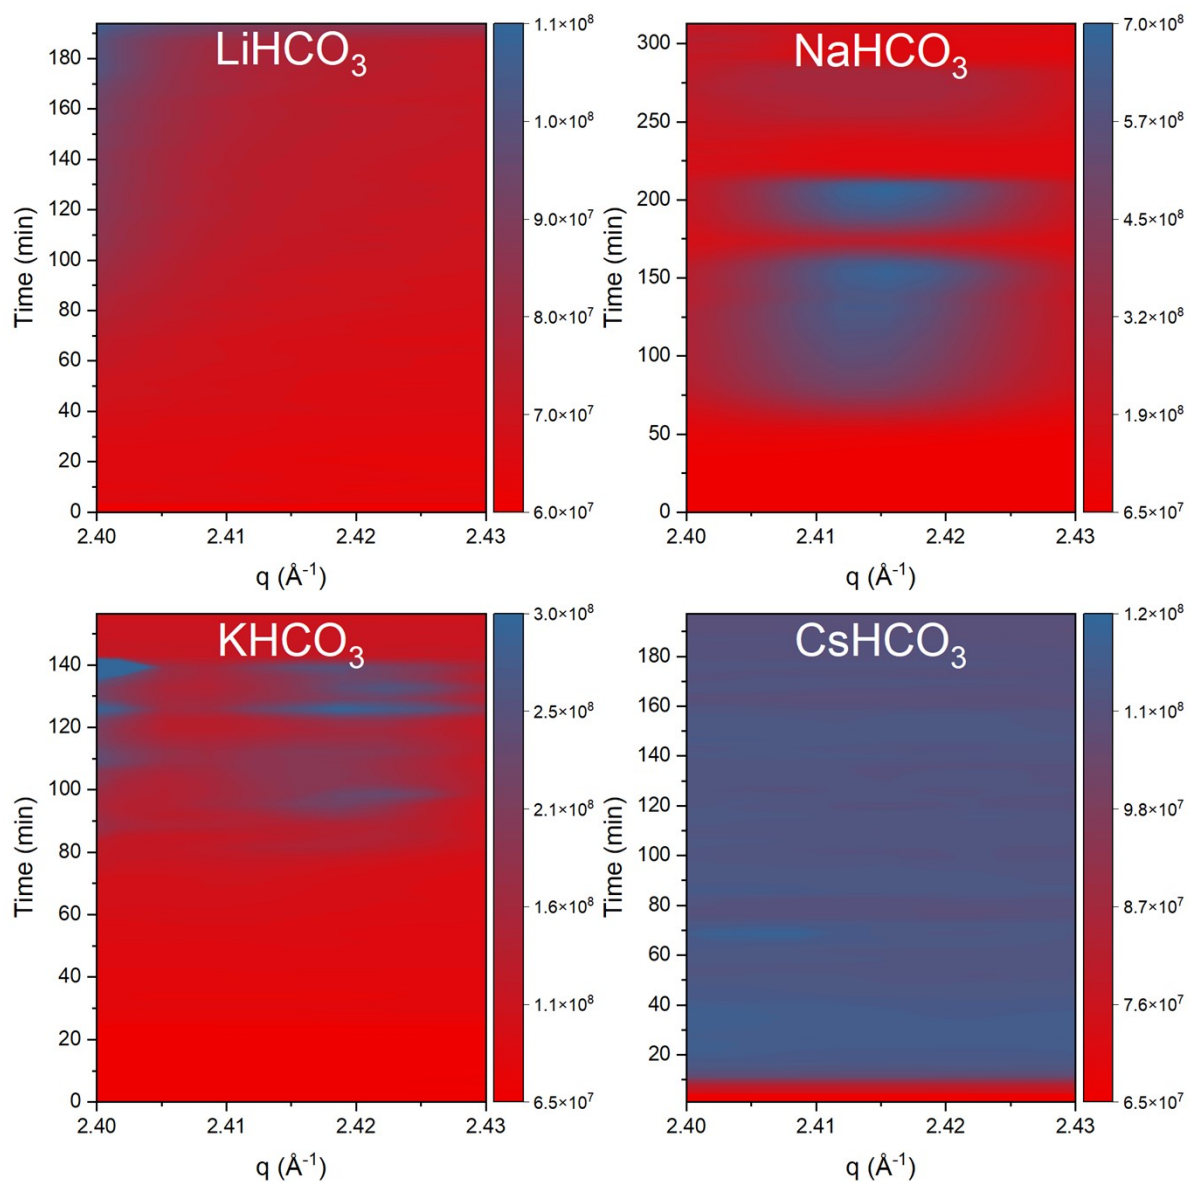

Figure S12. Analysis of the change in background signal (meaning a change in the electrolyte intensity) over electrolysis time right at the top of the catalyst layer in different alkali cations. All experiments were performed at  $200 \text{ mA} \cdot \text{cm}^{-2}$ .



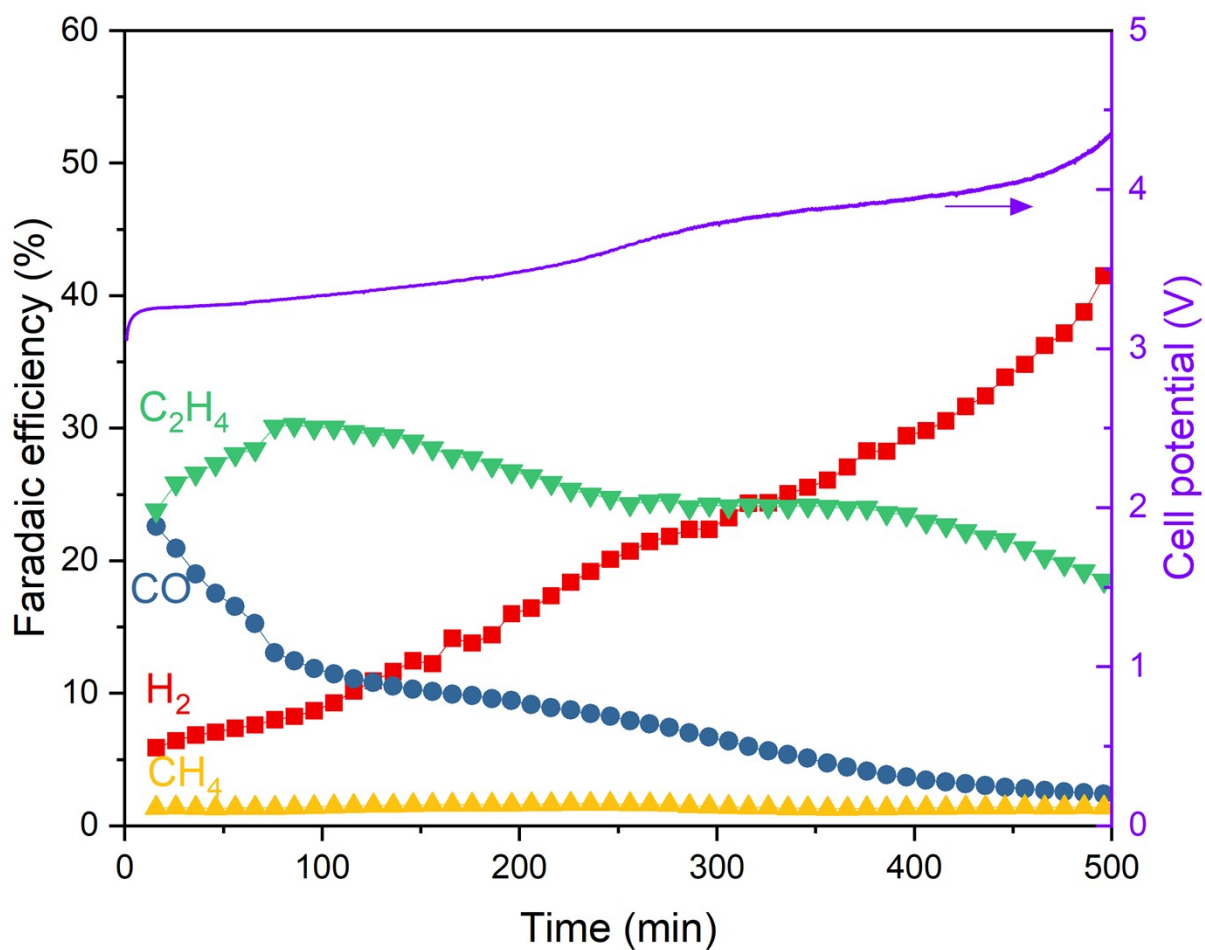

Figure S13. Changes in CO<sub>2</sub>RR gaseous products and HER selectivity (left y-axis) and cell potential (right y-axis) over electrolysis time. The experiment was performed at 200 mA·cm<sup>-2</sup> and in 0.1 M CsHCO<sub>3</sub> anolyte.

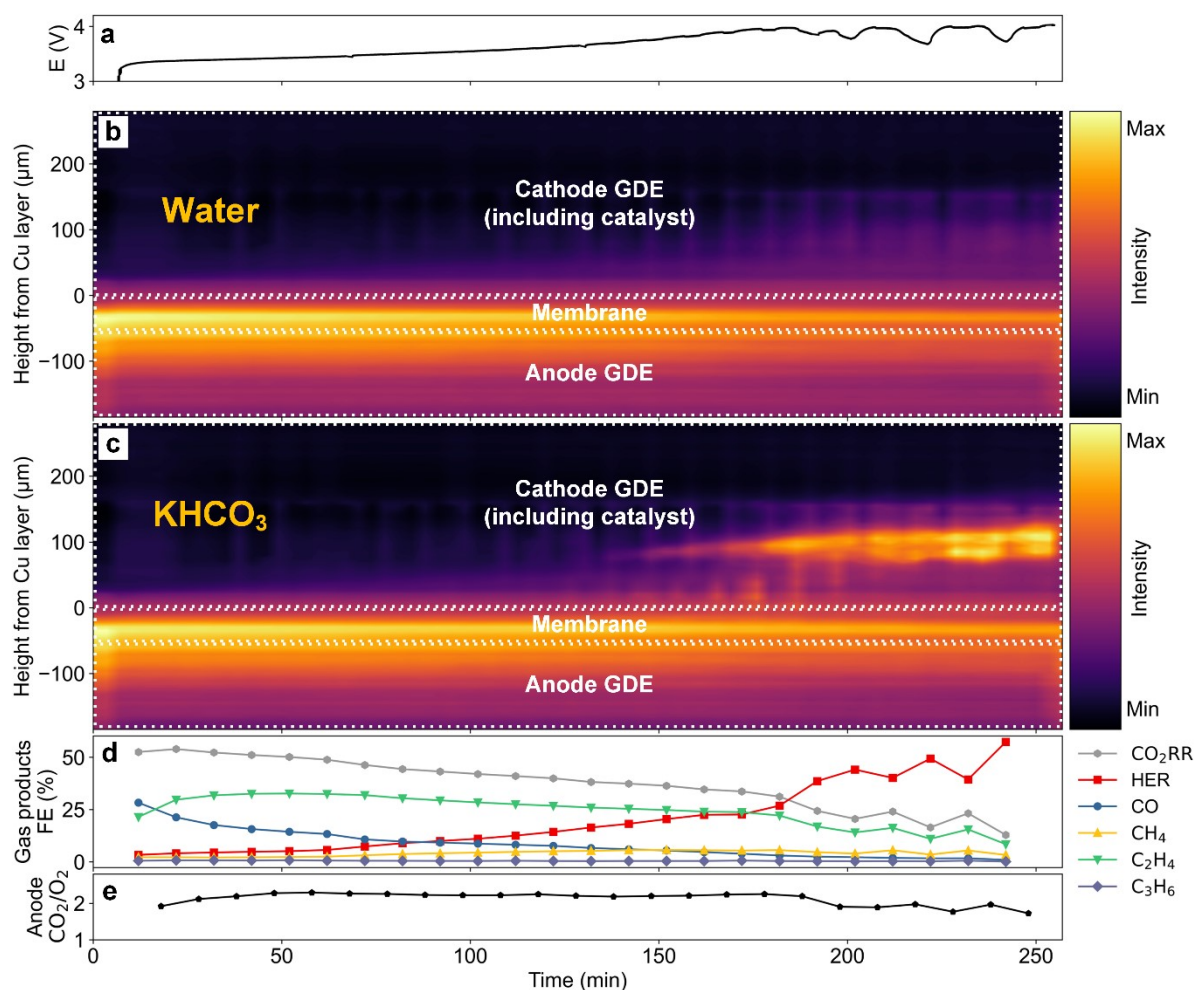

Figure S14. Changes in (a) cell potential, (b) electrolyte/water evolution, (c) salt precipitation, (d) gaseous  $\text{CO}_2\text{RR}$ /HER selectivity, and (e)  $\text{CO}_2/\text{O}_2$  ratio at the anode in the MEA over electrolysis time. The experiment was performed at  $200 \text{ mA} \cdot \text{cm}^{-2}$  and in  $0.1 \text{ M KHCO}_3$  anolyte. The color intensities shown in (b) and (c) are not comparable with each other and should be treated separately. Detailed  $\text{CO}_2\text{RR}$  liquid product data is presented in Table S5.

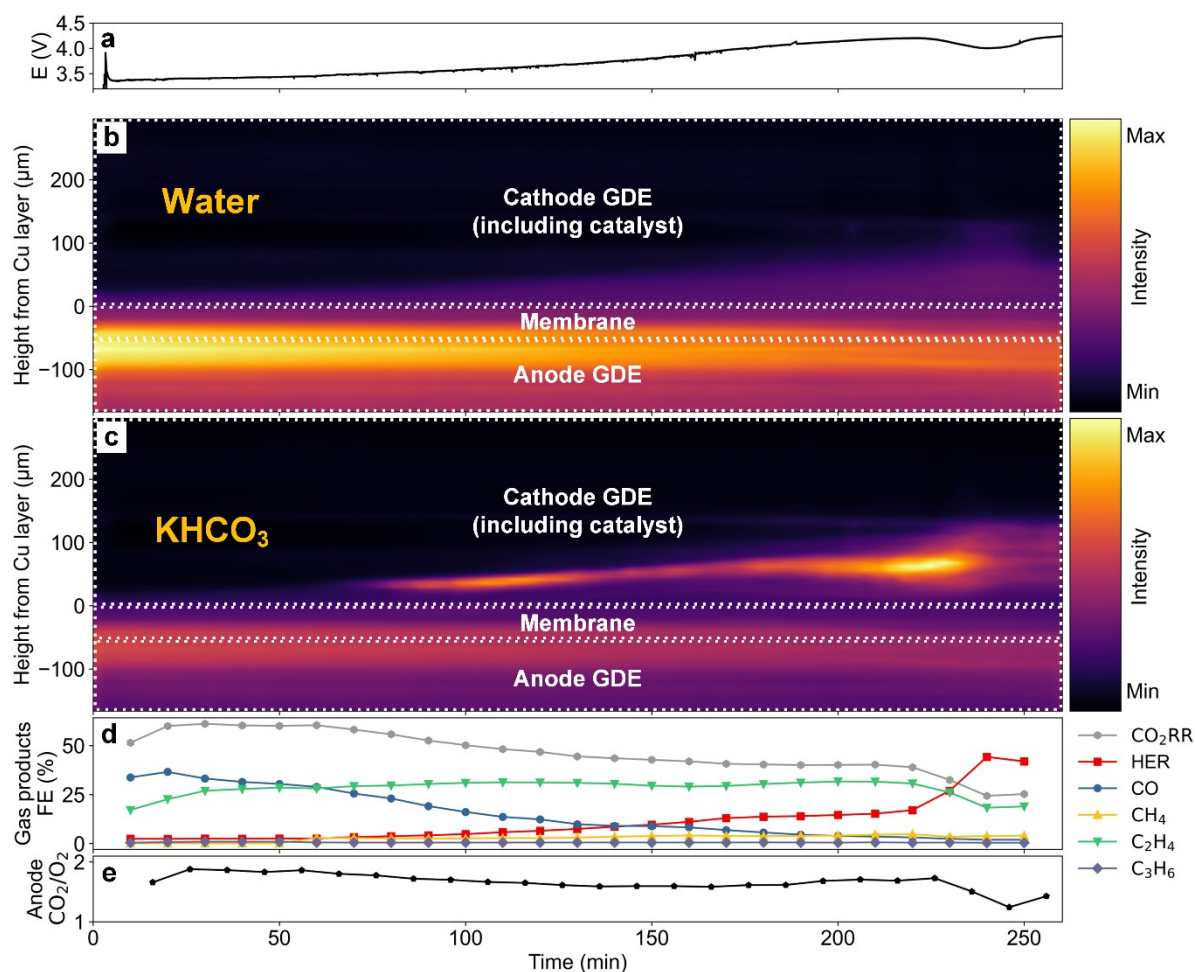

Figure S15. Changes in cell potential (top plot), electrolyte content and salt precipitation in the cathode GDE (middle heatmap plots), gaseous  $\text{CO}_2\text{RR}/\text{HER}$  selectivity (bottom plot) over electrolysis time. The experiment was performed at  $200 \text{ mA}\cdot\text{cm}^{-2}$  and in  $0.001 \text{ M KHCO}_3$  anolyte. Detailed  $\text{CO}_2\text{RR}$  liquid product data is presented in Table S6.

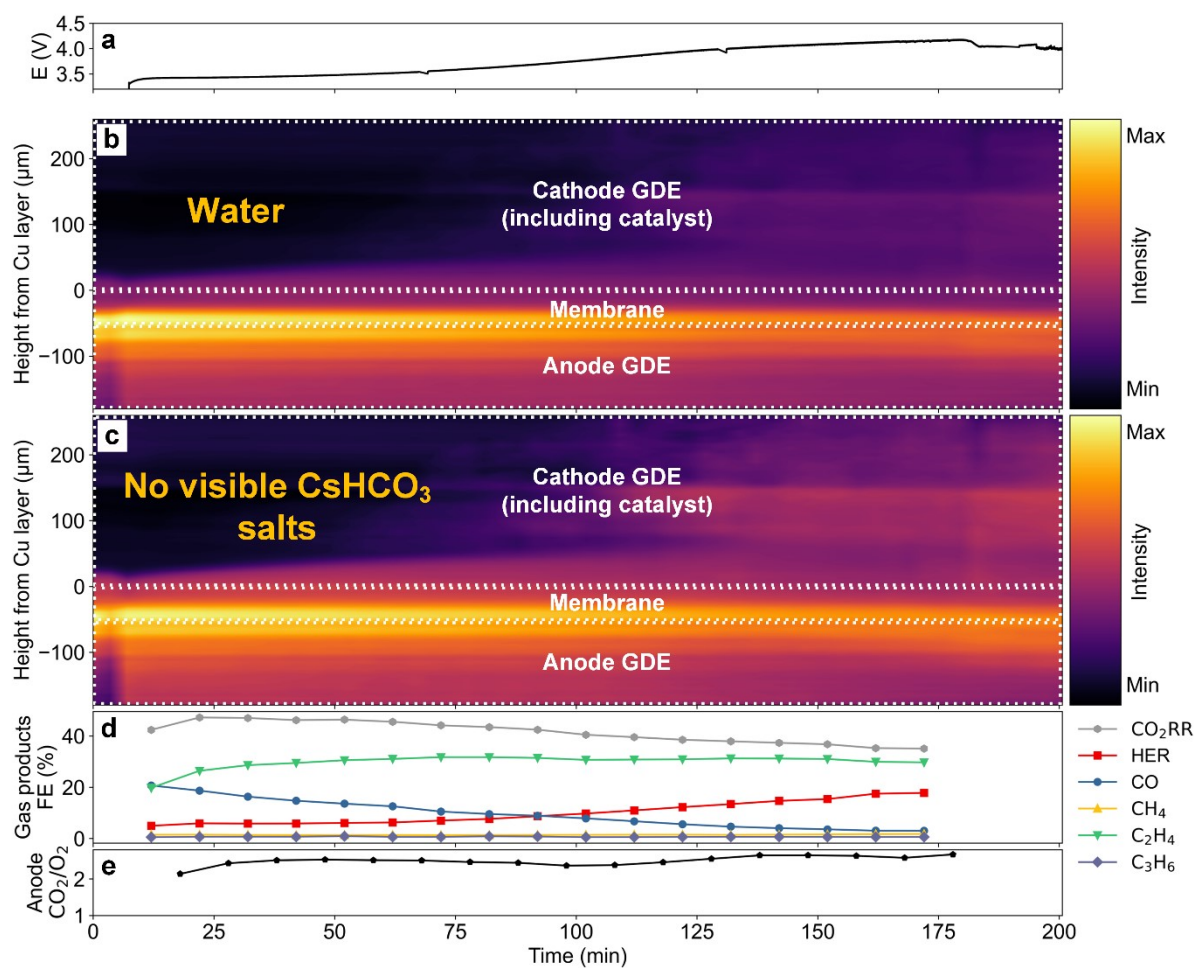

Figure S16. Changes in cell potential (top plot), electrolyte content and salt precipitation in the cathode GDE (middle heatmap plots), gaseous  $\text{CO}_2\text{RR}/\text{HER}$  selectivity (bottom plot) over electrolysis time. The experiment was performed at  $200 \text{ mA}\cdot\text{cm}^{-2}$  and in  $0.01 \text{ M CsHCO}_3$  anolyte. Detailed  $\text{CO}_2\text{RR}$  liquid product data is presented in Table S7.

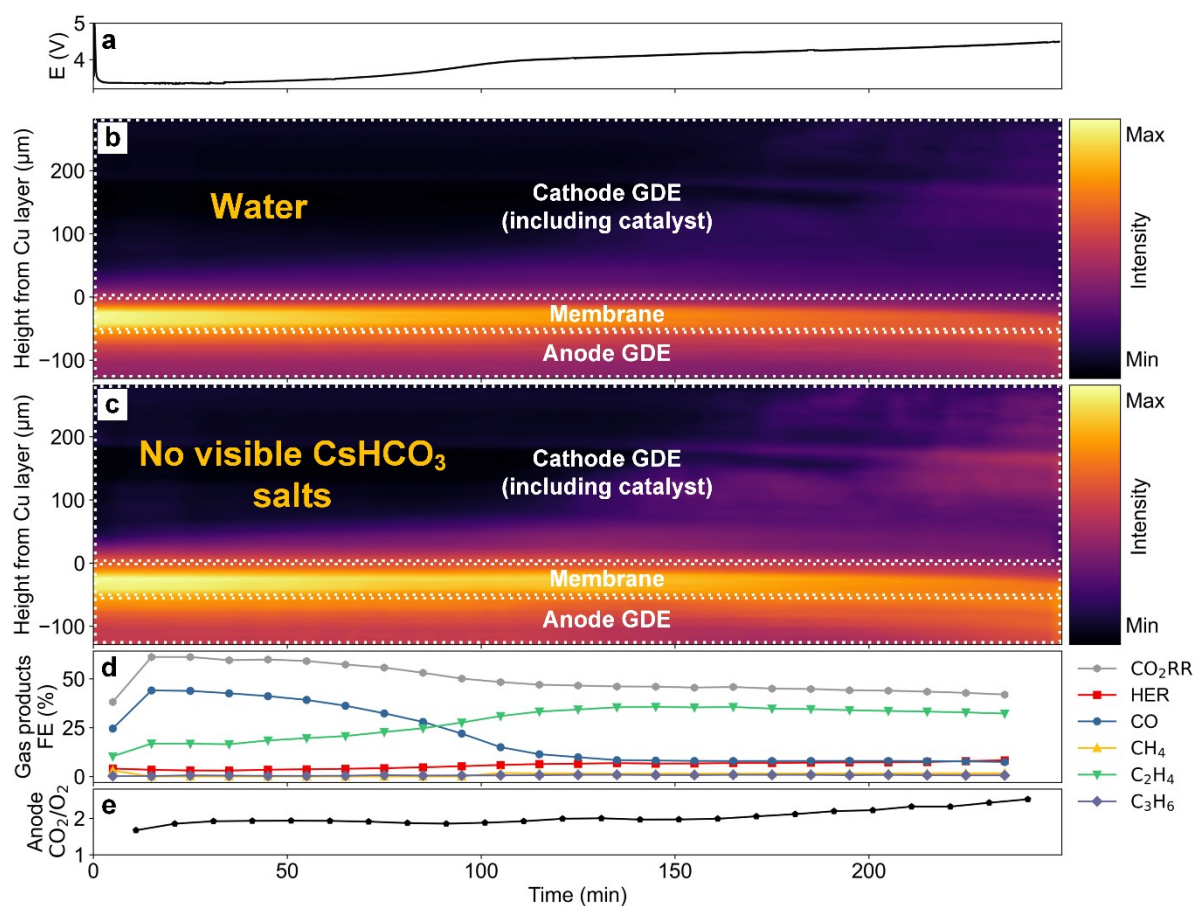

Figure S17. Changes in cell potential (top plot), electrolyte content and salt precipitation in the cathode GDE (middle heatmap plots), gaseous  $\text{CO}_2\text{RR}/\text{HER}$  selectivity (bottom plot) over electrolysis time. The experiment was performed at  $200 \text{ mA}\cdot\text{cm}^{-2}$  and in  $0.001 \text{ M CsHCO}_3$  anolyte. Detailed  $\text{CO}_2\text{RR}$  liquid product data is presented in Table S8.

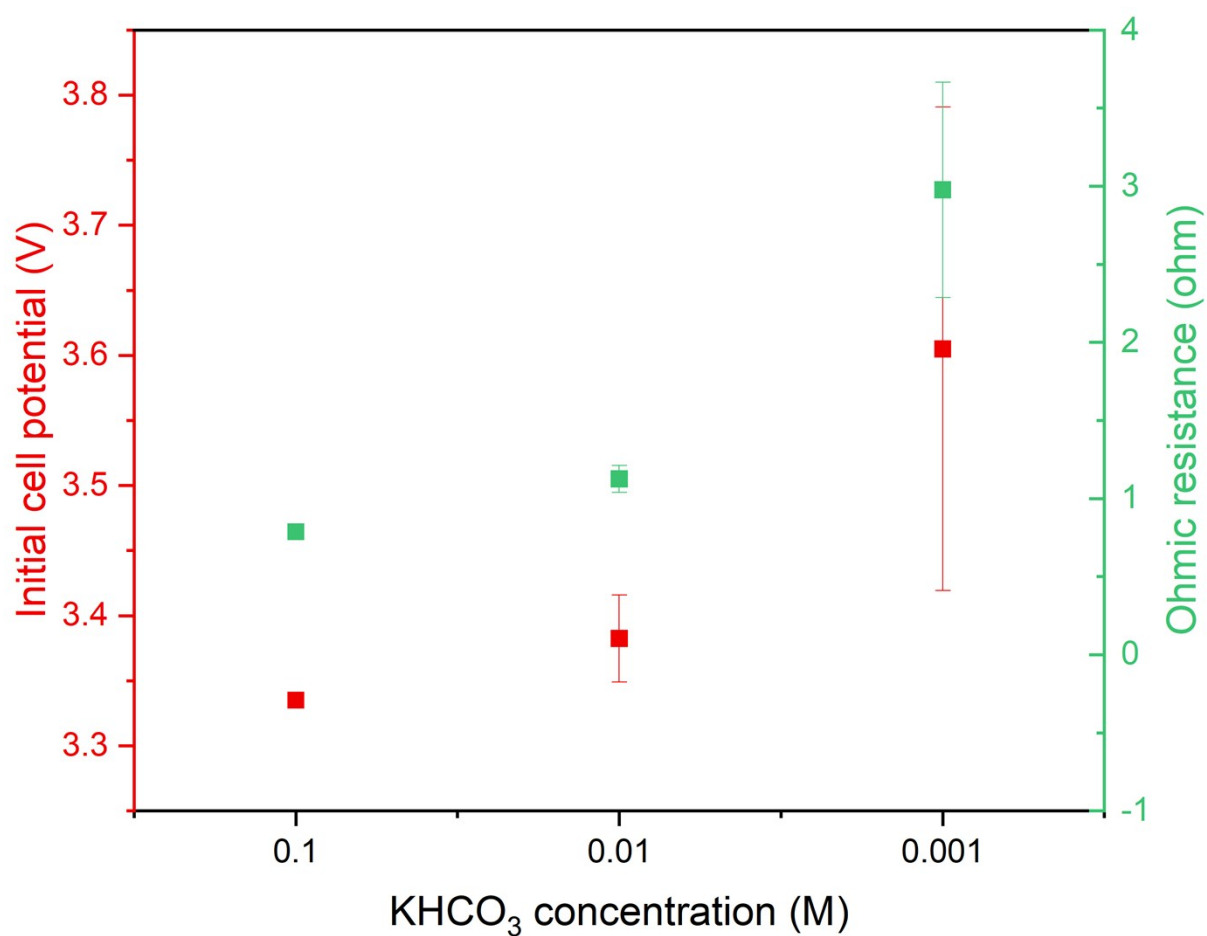

Figure S18. Changes in initial cell potential relate to changes in ohmic resistance (calculated via the current interrupt technique across the whole cell) at different KHCO<sub>3</sub> anolyte concentrations. All experiments were conducted at 200 mA·cm<sup>-2</sup>. The error bar shows the standard deviation from three separate measurements.

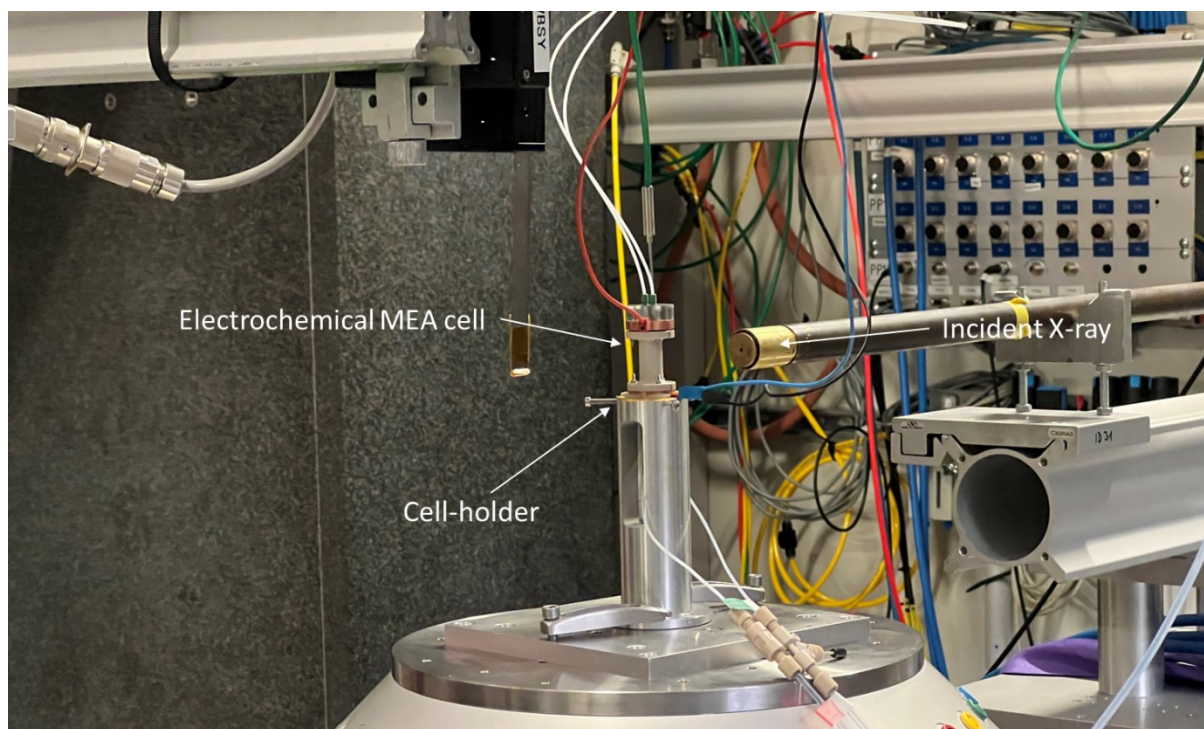

Figure S19. Digital photo of how the electrochemical cell was placed during X-ray measurement in front of the incident X-ray beam at ID 31, ESRF, France.

## **Tables**

Table S1. Faradaic efficiency of liquid CO<sub>2</sub>RR products (including both anode and cathode) in 0.1 M LiHCO<sub>3</sub> anolyte. The experiment was performed at 200 mA·cm<sup>-2</sup> (for the experiment presented in Figure 3 of the main manuscript).

| <b>Liquid products</b> | <b>Faradaic efficiency (%)</b> |
|------------------------|--------------------------------|
| Glycoaldehyde          | 0.03                           |
| Formate                | 0.08                           |
| Acetate                | 0                              |
| Ethylene Glycol        | 0.13                           |
| Hydroxyacetone         | 0                              |
| Acetaldehyde           | 0                              |
| Ethanol                | 0.04                           |
| Propanol               | 0                              |
| <b>Sum</b>             | <b>0.27</b>                    |



Table S2. Faradaic efficiency of liquid CO<sub>2</sub>RR products (including both anode and cathode) in 0.1 M NaHCO<sub>3</sub> anolyte. The experiment was performed at 200 mA·cm<sup>-2</sup> (for the experiment presented in Figure 4 of the main manuscript).

| <b>Liquid products</b> | <b>Faradaic efficiency (%)</b> |
|------------------------|--------------------------------|
| Glycoaldehyde          | 0.02                           |
| Formate                | 1.14                           |
| Acetate                | 3.11                           |
| Ethylene Glycol        | 0                              |
| Hydroxyacetone         | 0.06                           |
| Acetaldehyde           | 0.12                           |
| Ethanol                | 3.15                           |
| Propanol               | 0.05                           |
| <b>Sum</b>             | <b>7.65</b>                    |

Table S3. Faradaic efficiency of liquid CO<sub>2</sub>RR products (including both anode and cathode) in 0.1 M KHCO<sub>3</sub> anolyte. The experiment was performed at 200 mA·cm<sup>-2</sup> (for the experiment presented in Figure S6 above).

| <b>Liquid products</b> | <b>Faradaic efficiency (%)</b> |
|------------------------|--------------------------------|
| Glycoaldehyde          | 0.27                           |
| Formate                | 4.30                           |
| Acetate                | 13.29                          |
| Ethylene Glycol        | 0.18                           |
| Hydroxyacetone         | 0.12                           |
| Acetaldehyde           | 2.14                           |
| Ethanol                | 13.80                          |
| Propanol               | 1.72                           |
| <b>Sum</b>             | <b>35.82</b>                   |

Table S4. Faradaic efficiency of liquid CO<sub>2</sub>RR products (including both anode and cathode) in 0.1 M CsHCO<sub>3</sub> anolyte. The experiment was performed at 200 mA·cm<sup>-2</sup> (for the experiment presented in Figure 5 of the main manuscript and Figure S7 above).

| <b>Liquid products</b> | <b>Faradaic efficiency (%)</b> |
|------------------------|--------------------------------|
| Glycoaldehyde          | 0.38                           |
| Formate                | 4.12                           |
| Acetate                | 12.53                          |
| Ethylene Glycol        | 0.32                           |
| Hydroxyacetone         | 0.09                           |
| Acetaldehyde           | 4.25                           |
| Ethanol                | 24.03                          |
| Propanol               | 4.75                           |
| <b>Sum</b>             | <b>50.47</b>                   |

Table S5. Faradaic efficiency of liquid CO<sub>2</sub>RR products (including both anode and cathode) in 0.01 M KHCO<sub>3</sub> anolyte. The experiment was performed at 200 mA·cm<sup>-2</sup> (for the experiment presented in Figure S9 above).

| <b>Liquid products</b> | <b>Faradaic efficiency (%)</b> |
|------------------------|--------------------------------|
| Glycoaldehyde          | 0.25                           |
| Formate                | 3.44                           |
| Acetate                | 11.57                          |
| Ethylene Glycol        | 0.07                           |
| Hydroxyacetone         | 0.02                           |
| Acetaldehyde           | 2.15                           |
| Ethanol                | 14.78                          |
| Propanol               | 1.81                           |
| <b>Sum</b>             | <b>34.09</b>                   |

Table S6. Faradaic efficiency of liquid CO<sub>2</sub>RR products (including both anode and cathode) in 0.001 M KHCO<sub>3</sub> anolyte. The experiment was performed at 200 mA·cm<sup>-2</sup> (for the experiment presented in Figure S10 above).

| <b>Liquid products</b> | <b>Faradaic efficiency (%)</b> |
|------------------------|--------------------------------|
| Glycoaldehyde          | 0.40                           |
| Formate                | 2.57                           |
| Acetate                | 10.95                          |
| Ethylene Glycol        | 0.04                           |
| Hydroxyacetone         | 0                              |
| Acetaldehyde           | 2.55                           |
| Ethanol                | 17.61                          |
| Propanol               | 1.15                           |
| <b>Sum</b>             | <b>35.28</b>                   |

Table S7. Faradaic efficiency of liquid CO<sub>2</sub>RR products (including both anode and cathode) in 0.01 M CsHCO<sub>3</sub> anolyte. The experiment was performed at 200 mA·cm<sup>-2</sup> (for the experiment presented in Figure S11 above).

| <b>Liquid products</b> | <b>Faradaic efficiency (%)</b> |
|------------------------|--------------------------------|
| Glycoaldehyde          | 0.43                           |
| Formate                | 5.01                           |
| Acetate                | 11.69                          |
| Ethylene Glycol        | 0.35                           |
| Hydroxyacetone         | 0.11                           |
| Acetaldehyde           | 3.03                           |
| Ethanol                | 15.99                          |
| Propanol               | 3.47                           |
| <b>Sum</b>             | <b>40.08</b>                   |

Table S8. Faradaic efficiency of liquid CO<sub>2</sub>RR products (including both anode and cathode) in 0.001 M CsHCO<sub>3</sub> anolyte. The experiment was performed at 200 mA·cm<sup>-2</sup> (for the experiment presented in Figure S12 above).

| <b>Liquid products</b> | <b>Faradaic efficiency (%)</b> |
|------------------------|--------------------------------|
| Glycoaldehyde          | 0.54                           |
| Formate                | 3.39                           |
| Acetate                | 6.21                           |
| Ethylene Glycol        | 0.16                           |
| Hydroxyacetone         | 0.04                           |
| Acetaldehyde           | 2.53                           |
| Ethanol                | 17.32                          |
| Propanol               | 3.89                           |
| <b>Sum</b>             | <b>34.09</b>                   |

## References:

1. A. Xu, N. Govindarajan, G. Kastlunger, S. Vijay and K. Chan, *Accounts of Chemical Research*, 2022, **55**, 495-503.
2. S. Ringe, E. L. Clark, J. Resasco, A. Walton, B. Seger, A. T. Bell and K. Chan, *Energy & Environmental Science*, 2020, **13**, 646-647.
3. S. Nitopi, E. Bertheussen, S. B. Scott, X. Liu, A. K. Engstfeld, S. Horch, B. Seger, I. E. L. Stephens, K. Chan, C. Hahn, J. K. Nørskov, T. F. Jaramillo and I. Chorkendorff, *Chemical Reviews*, 2019, **119**, 7610-7672.
4. B. Endrődi, A. Samu, E. Kecsenovity, T. Halmágyi, D. Sebők and C. Janáky, *Nature Energy*, 2021, **6**, 439-448.
5. M. R. Singh, Y. Kwon, Y. Lum, J. W. Ager and A. T. Bell, *Journal of the American Chemical Society*, 2016, **138**, 13006-13012.
6. J. Resasco, L. D. Chen, E. Clark, C. Tsai, C. Hahn, T. F. Jaramillo, K. Chan and A. T. Bell, *Journal of the American Chemical Society*, 2017, **139**, 11277-11287.
7. S. Verma, X. Lu, S. Ma, R. I. Masel and P. J. A. Kenis, *Physical Chemistry Chemical Physics*, 2016, **18**, 7075-7084.
8. S. S. Bhargava, F. Proietto, D. Azmoodeh, E. R. Cofell, D. A. Henckel, S. Verma, C. J. Brooks, A. A. Gewirth and P. J. A. Kenis, *ChemElectroChem*, 2020, **7**, 2001-2011.
9. N. Gupta, M. Gattrell and B. MacDougall, *Journal of Applied Electrochemistry*, 2006, **36**, 161-172.
10. E. L. Clark and A. T. Bell, *Journal of the American Chemical Society*, 2018, **140**, 7012-7020.
11. T. Burdyny and W. A. Smith, *Energy & Environmental Science*, 2019, **12**, 1442-1453.
12. L.-C. Weng, A. T. Bell and A. Z. Weber, *Energy & Environmental Science*, 2019, **12**, 1950-1968.
13. K. P. Kuhl, E. R. Cave, D. N. Abram and T. F. Jaramillo, *Energy & Environmental Science*, 2012, **5**, 7050-7059.
